# Supplementary material for: Language-Related Disparities in Pain Management in the Post-Anesthesia Care Unit for Children Undergoing Laparoscopic Appendectomy
Source: MDPI journal article supplement (doi:10.3390/children7100163), 2020-10-04
Supplement: s1 [file s1]

## Supplementary

**Table S1.** Intraoperative opioid administration (in OME per kilogram), by English proficiency.

|                                                      | <b>Adjusted Estimate<br/>(95%CI)*</b> |
|------------------------------------------------------|---------------------------------------|
| Low English proficient<br>(ref = English proficient) | 1.07 (0.70,1.59)                      |
| Age in years                                         | 0.99 (0.95,1.03)                      |
| Gender (ref = male)                                  | 0.96 (0.70,1.32)                      |

Abbreviations: OME, oral morphine equivalents; CI, confidence interval. \* Coefficients were also adjusted for race (White, Black, Asian, and other) but these are not reported given the small cohort size of some racial subgroups.
